# Supplementary material for: Magnetic Plasticine™: a versatile magnetorheological material
Source: Royal Society of Chemistry journal article supplement (doi:10.1039/c2jm32375c), 2012-01-01
Supplement: c2jm32375c.pdf [file c2jm32375c.pdf]

## Supporting Information:

### Magnetic Plasticene: A Versatile Magnetorheological Material

Shouhu Xuan<sup>1\*</sup>, Yanli Zhang<sup>2</sup>, Yufeng Zhou<sup>2</sup>, Wanquan Jiang<sup>2\*</sup>, Xinglong Gong<sup>1\*</sup>

#

<sup>1</sup> CAS Key Laboratory of Mechanical Behavior and Design of Materials, Department of Modern Mechanics, The University of Science and Technology of China, Hefei, 230026, P. R. China

<sup>2</sup> Department of Chemistry, The University of Science and Technology of China, Hefei, 230026, P. R. China

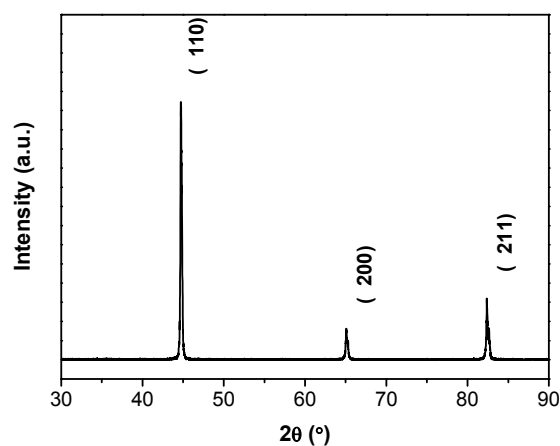

#

Figure S11. XRD pattern of the magnetic CI particles.

#

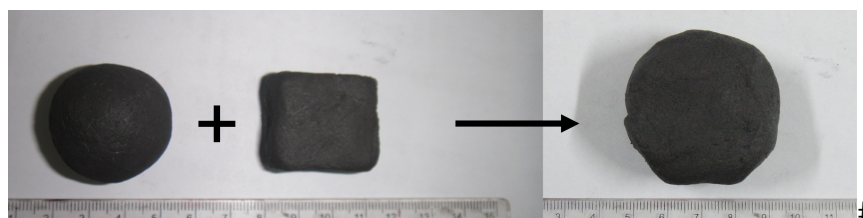

#

Figure S12. The photographs of the as-prepared magnetic plasticine.

#

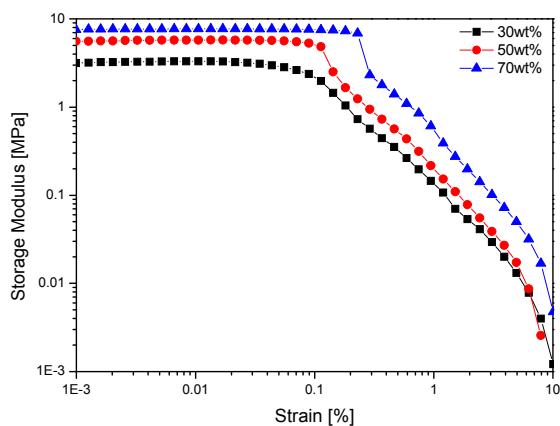

#

**Figure S13.** Strain dependent storage modulus curves of the magnetic plasticine with different iron content.

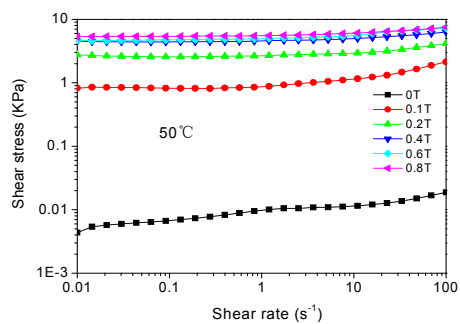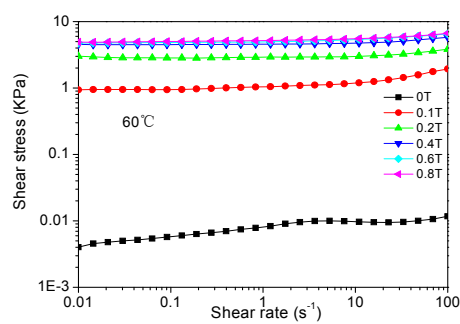

#

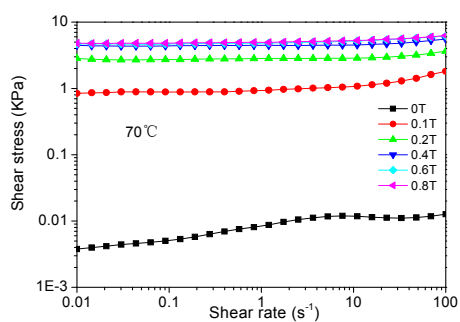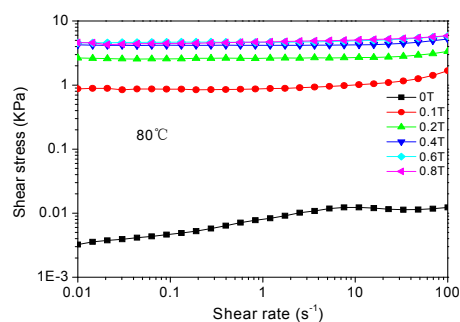

#

**Figure S14.** Shear rate dependent shear stress curves of the magnetic plasticine (50 wt%) under different temperature.

#

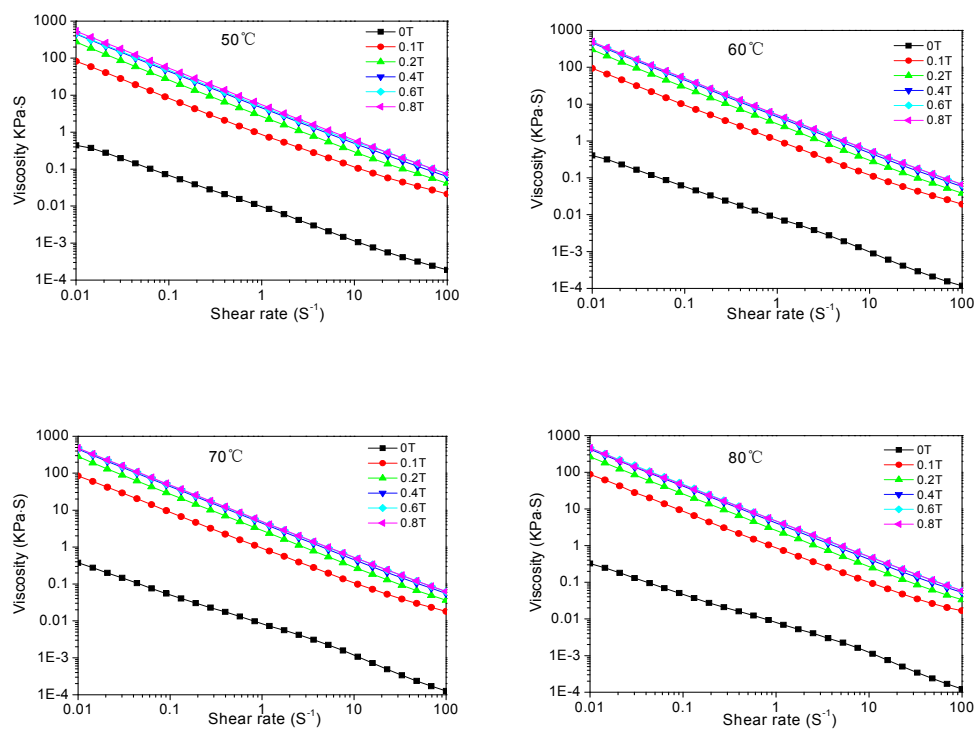

#

**Figure SI5.** Viscosity curves of the magnetic plasticine (50 wt%) under different temperature and magnetic field.

#

#
